# Supplementary material for: Gel phase formation in dilute triblock copolyelectrolyte complexes
Source: PubMed Central journal article supplement (PMC5331217; doi:10.1038/ncomms14131), 2017-02-23
Supplement: ncomms14131-s1.pdf [file ncomms14131-s1.pdf]

Supplementary Figures

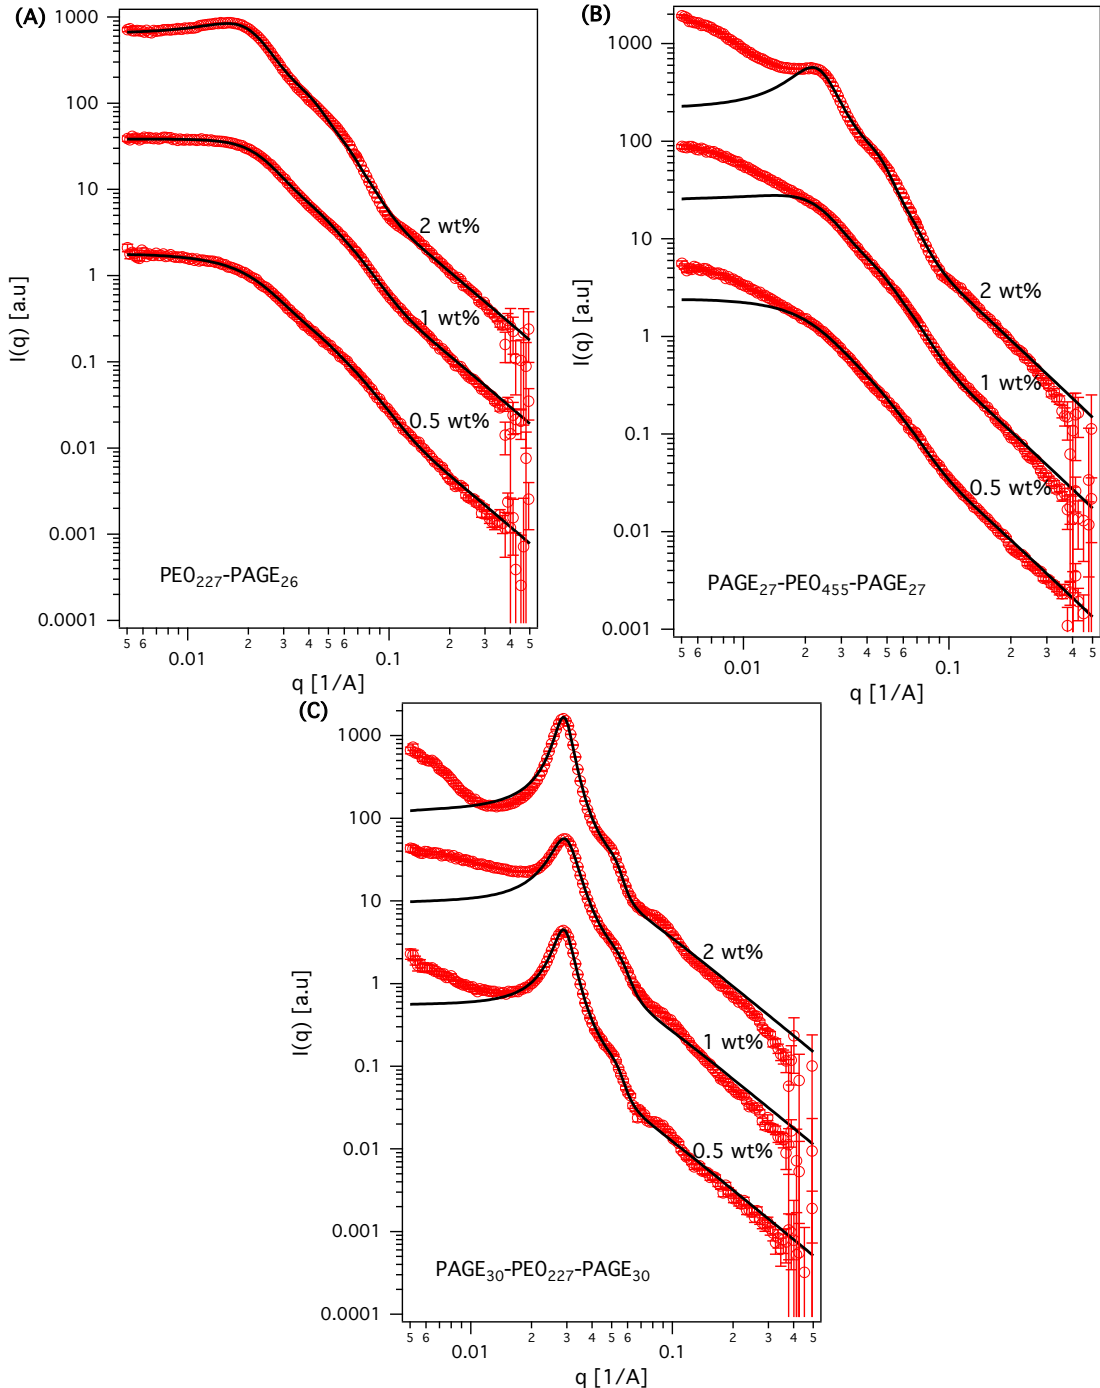

Supplementary Figure 1: SANS scattering intensities and the model fits for various oppositely charged di- and triblock copolyelectrolyte assemblies.

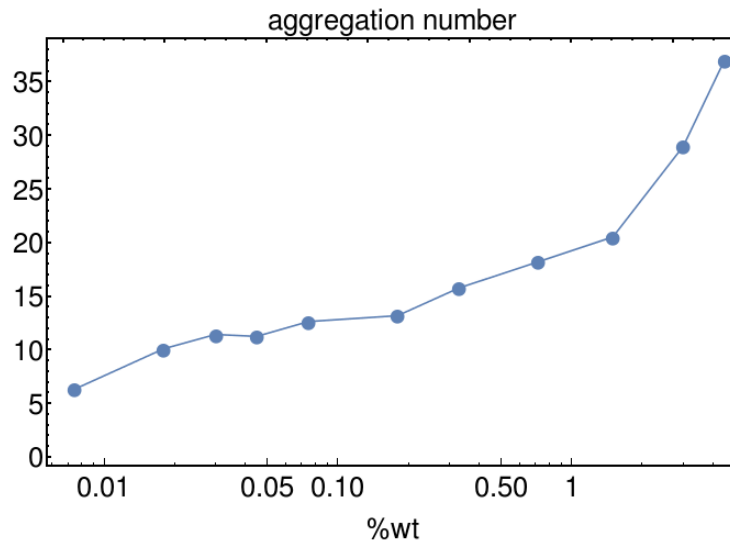

**Supplementary Figure 2:** Chain aggregation number for the PEC domains in triblock copolyelectrolyte assemblies with varying polymer concentrations. The aggregation number increases initially with polymer concentration before achieving a plateau around 0.04 wt%. The growth at higher polymer is expected to be an artefact resulting from the implicit solvent conditions in the simulations.

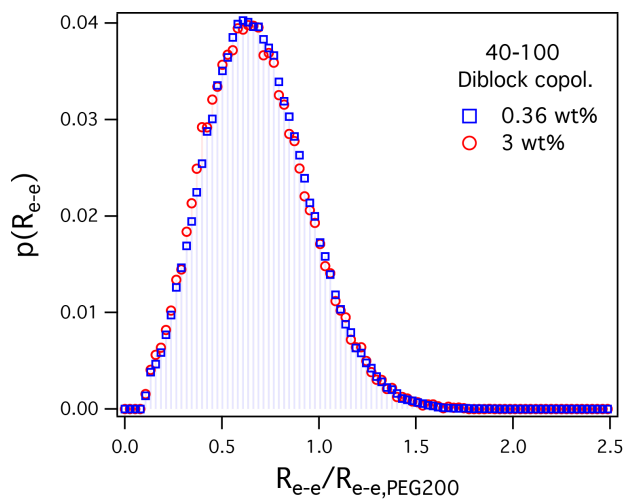

**Supplementary Figure 3:** Distribution of the end-to-end distances of the neutral block in the diblock copolyelectrolyte micelles at  $\phi = 0.36$  and 3 wt%.

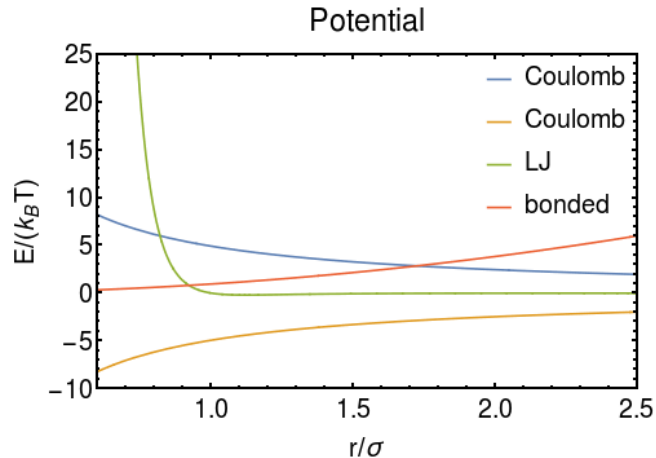

**Supplementary Figure 4:** Potentials employed in the simulations. Shown Coulomb potential for same charge particles -repulsive and same charge attractive. Lennard-Jones potential -repulsive and harmonic bonded potential.

## Supplementary Methods

### Analysis of the SANS scattering data

The SANS scattering profiles were fit via a least-squares minimization in MATLAB using the models for PEC micelle scattering described previously in the literature<sup>1</sup>. The experimental data and the corresponding fits are shown in Supplementary Fig. 1 for the diblock and triblock copolyelectrolyte assemblies.

## Supplementary References

1. Krogstad, D. V. *et al.* Small Angle Neutron Scattering Study of Complex Coacervate Micelles and Hydrogels Formed from Ionic Diblock and Triblock Copolymers. *J. Phys. Chem. B* **118**, 13011–13018 (2014).
